# Supplementary material for: Computer-guided design of optimal microbial consortia for immune system modulation
Source: eLife journal article supplement (doi:10.7554/elife.30916), 2018-04-16
Supplement: supp [file elife-30916-supp-v1.zip]

Archive with 6 entries (6 files):
- elife_poa_e30916_Figure_4_figure_supplement_3.pdf
- elife_poa_e30916_Figure_4_figure_supplement_2.pdf
- elife_poa_e30916_Figure_4_source_data_1.xls
- elife_poa_e30916_Transparent_Reporting_File.pdf
- elife_poa_e30916_Figure_2_source_data_1.xls
- elife_poa_e30916_Figure_4_figure_supplement_1.pdf
