# Supplementary material for: Computer-guided design of optimal microbial consortia for immune system modulation
Source: eLife journal article supplement (doi:10.7554/elife.30916), 2018-04-16
Supplement: supp [file elife-30916-supp-v1.zip › elife_poa_e30916_Figure_2_source_data_1.xls]

## Sheet: Fig. 2A
ng strain DNA/ug total fecal DNA												Note	Percentage of CD4+FOXP3+	Note
Strain4	Strain7	Strain9	Strain13	Strain14	Strain15	Strain16	Strain21	Strain26	Strain27	Strain28	Strain29
495.07	0	0	0	0	0	0	0	0	0	0	0	simulated	29	Atarashi et al., 2013
495.07	0	0	0	0	0	0	0	0	0	0	0	simulated	29	Atarashi et al., 2013
495.07	0	0	0	0	0	0	0	0	0	0	0	simulated	10.7	Atarashi et al., 2013
0	174.84	0	0	0	0	0	0	0	0	0	0	simulated	17.53	Atarashi et al., 2013
0	174.84	0	0	0	0	0	0	0	0	0	0	simulated	19.12	Atarashi et al., 2013
0	174.84	0	0	0	0	0	0	0	0	0	0	simulated	19.12	Atarashi et al., 2013
0	0	55.008	0	0	0	0	0	0	0	0	0	simulated	15.1	Atarashi et al., 2013
0	0	55.008	0	0	0	0	0	0	0	0	0	simulated	14.4	Atarashi et al., 2013
0	0	55.008	0	0	0	0	0	0	0	0	0	simulated	9.06	Atarashi et al., 2013
0	0	0	4.76	0	0	0	0	0	0	0	0	simulated	4.94	Atarashi et al., 2013
0	0	0	4.76	0	0	0	0	0	0	0	0	simulated	11.6	Atarashi et al., 2013
0	0	0	4.76	0	0	0	0	0	0	0	0	simulated	12.6	Atarashi et al., 2013
0	0	0	0	1.2948	0	0	0	0	0	0	0	simulated	17.2	Atarashi et al., 2013
0	0	0	0	1.2948	0	0	0	0	0	0	0	simulated	12.8	Atarashi et al., 2013
0	0	0	0	1.2948	0	0	0	0	0	0	0	simulated	9.85	Atarashi et al., 2013
0	0	0	0	0	198.47	0	0	0	0	0	0	simulated	10.2	Atarashi et al., 2013
0	0	0	0	0	198.47	0	0	0	0	0	0	simulated	10.4	Atarashi et al., 2013
0	0	0	0	0	198.47	0	0	0	0	0	0	simulated	17.6	Atarashi et al., 2013
0	0	0	0	0	0	16.473	0	0	0	0	0	simulated	10.18	Atarashi et al., 2013
0	0	0	0	0	0	16.473	0	0	0	0	0	simulated	11.71	Atarashi et al., 2013
0	0	0	0	0	0	16.473	0	0	0	0	0	simulated	14.79	Atarashi et al., 2013
0	0	0	0	0	0	0	0.89558	0	0	0	0	simulated	9.22	Atarashi et al., 2013
0	0	0	0	0	0	0	0.89558	0	0	0	0	simulated	7.98	Atarashi et al., 2013
0	0	0	0	0	0	0	0.89558	0	0	0	0	simulated	10.41	Atarashi et al., 2013
0	0	0	0	0	0	0	0	1.1577	0	0	0	simulated	14.03	Atarashi et al., 2013
0	0	0	0	0	0	0	0	1.1577	0	0	0	simulated	13.51	Atarashi et al., 2013
0	0	0	0	0	0	0	0	1.1577	0	0	0	simulated	12.61	Atarashi et al., 2013
0	0	0	0	0	0	0	0	0	473.32	0	0	simulated	12	Atarashi et al., 2013
0	0	0	0	0	0	0	0	0	473.32	0	0	simulated	20.3	Atarashi et al., 2013
0	0	0	0	0	0	0	0	0	473.32	0	0	simulated	10.4	Atarashi et al., 2013
0	0	0	0	0	0	0	0	0	0	224.23	0	simulated	18.3	Atarashi et al., 2013
0	0	0	0	0	0	0	0	0	0	224.23	0	simulated	19.95	Atarashi et al., 2013
0	0	0	0	0	0	0	0	0	0	224.23	0	simulated	17.79	Atarashi et al., 2013
0	0	0	0	0	0	0	0	0	0	0	291.22	simulated	13.36	Atarashi et al., 2013
0	0	0	0	0	0	0	0	0	0	0	291.22	simulated	9.08	Atarashi et al., 2013
0	0	0	0	0	0	0	0	0	0	0	291.22	simulated	19.62	Atarashi et al., 2013
0	0	0	0	0	0	0	0	0	0	0	291.22	simulated	25.63	Atarashi et al., 2013
216.67	7.4697	1.1106	0.89697	0.024242	0	23.485	0.11864	0.0051667	215.15	65.758	80.606	measured at day 35	53.2
115.45	2.9091	0.82727	1.8485	0.16212	0	25.303	0.19091	0.0079848	222.73	142.88	96.061	measured at day 35	45.1
136.21	6.7424	1.2712	1.5606	0.012227	0	31.061	0.40152	0.0026818	275.76	85.909	127.88	measured at day 35	53.1
128.79	3.2424	0.60152	1.5758	0.55909	0	33.788	0.055909	0.015455	251.52	100.91	66.818	measured at day 35	30.4
177.27	5.6061	0.27576	0.97879	0.39545	0	12.773	0.39091	0.14364	119.85	83.636	60.152	measured at day 35	40.9
0	10.121	1.5455	0.85	0.26667	109.39	20.303	0.19091	0.115	136.97	80.303	116.97	measured at day 35	33.9
0	11.076	0.4197	0.82273	0.41818	128.79	23.636	0.36061	0.11939	131.21	126.06	82.424	measured at day 35	42.1
0	16.364	0.45303	0.94091	0.54848	104.39	27.879	0.074545	0.11212	145	55.455	118.64	measured at day 35	30.5
0	6.4545	0.96212	0.82424	0.54848	145.45	23.182	0.19242	0.22576	134.24	150	83.788	measured at day 35	26.7
118.94	9.3333	0.31667	1.2939	0.91212	150.76	29.697	1.147	0.31667	384.85	93.636	0	measured at day 35	53.4
233.33	4.803	0.36818	1.5909	0.64091	101.82	12.242	0.098485	0.10242	206.06	28.03	0.0094697	measured at day 35	16.3
372.73	6.7424	0.074394	1.0515	0.51515	120.3	12.924	0.24848	0.077879	219.7	9.2879	0	measured at day 35	42.5
240.91	1.0636	0.39091	1.2379	0.52576	138.64	12.364	0.049545	0.079848	231.82	25.606	0	measured at day 35	9.9
145.15	6.2121	0.80455	1.9394	1.1545	210.61	20.758	0.1697	0.30303	327.27	60.909	0	measured at day 35	21.8

## Sheet: Fig. 2B
	CD4+FOXP3+ Treg induction per species	CD4+FOXP3+ Treg induction per species scaled by mono-colonization concentration
Background	7.2377
Strain4	0.033513	16.5912
Strain7	0.067145	11.7394
Strain9	0.10286	5.6582
Strain13	0.26094	1.2421
Strain14	0.35744	0.4628
Strain15	-0.0038012	-0.7544
Strain16	0.51227	8.4385
Strain21	5.3199	4.7644
Strain26	3.1475	3.6438
Strain27	0.014344	6.7895
Strain28	0.057419	12.8747
Strain29	0.039992	11.6464
