# Supplementary material for: Computer-guided design of optimal microbial consortia for immune system modulation
Source: eLife journal article supplement (doi:10.7554/elife.30916), 2018-04-16
Supplement: supp [file elife-30916-supp-v1.zip › elife_poa_e30916_Figure_4_source_data_1.xls]

## Sheet: Fig. 4A
Consortium name	H1	H2	M1	M2	L
Rank	1	2	129	452	495
TrIS	54.2773	52.2648	26.8738	5.0342	0.8744
	Median predicted steady-state concentrations
Strain4	0	458.95	268.41	0	0
Strain7	165.15	163.65	164.27	0	0
Strain9	0	0	0	9.9077	0
Strain13	0	0	0	0	0
Strain14	0	0	0.5754	0	0.55715
Strain15	0	0	0	0	98.158
Strain16	0	0	0	15.0775	14.473
Strain21	0	0	0	0	0
Strain26	0	0	0	0	0
Strain27	1565.3	1097.9	0	287.122	0
Strain28	184.81	0	117.87	0	0
Strain29	260.71	260.66	0	32.971	16.531

## Sheet: Fig. 4E
Consortium name	Percentage of CD4+FOXP3+
GF	9.12
GF	24.8
GF	20.3
GF	18
GF	23.7
GF	7.59
GF	20.1
GF	24.1
H1	37.5
H1	44
H1	30.1
H1	30.6
H1	43.6
H1	44.8
H1	32.7
H1	22.7
H2	46.5
H2	45.3
H2	38.7
H2	35.1
H2	41.7
H2	33.1
H2	34.3
H2	31.7
M1	23.5
M1	41.3
M1	26.2
M1	43.5
M1	32.5
M2	32.3
M2	28.1
M2	25.4
M2	23.8
M2	31.7
L	29.3
L	26.8
L	24.3
