# Supplementary figures and images for: Computer-guided design of optimal microbial consortia for immune system modulation
Source: eLife journal article supplement (doi:10.7554/elife.30916), 2018-04-16

Observed mean germ-free normalized  
acetic acid levels

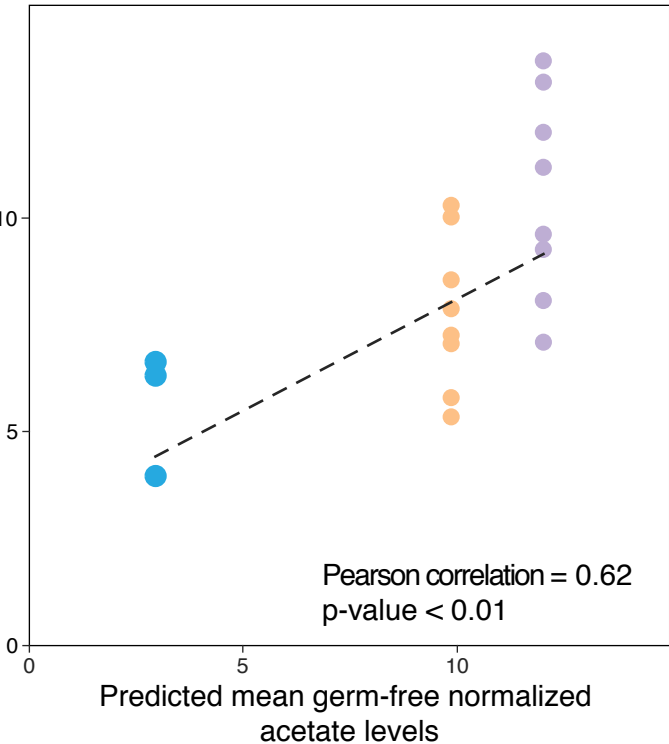

Supplement: supp [file elife-30916-supp-v1.zip › elife_poa_e30916_Figure_4_figure_supplement_3.pdf]

Measured acetic acid concentration in  $\mu\text{g/g}$

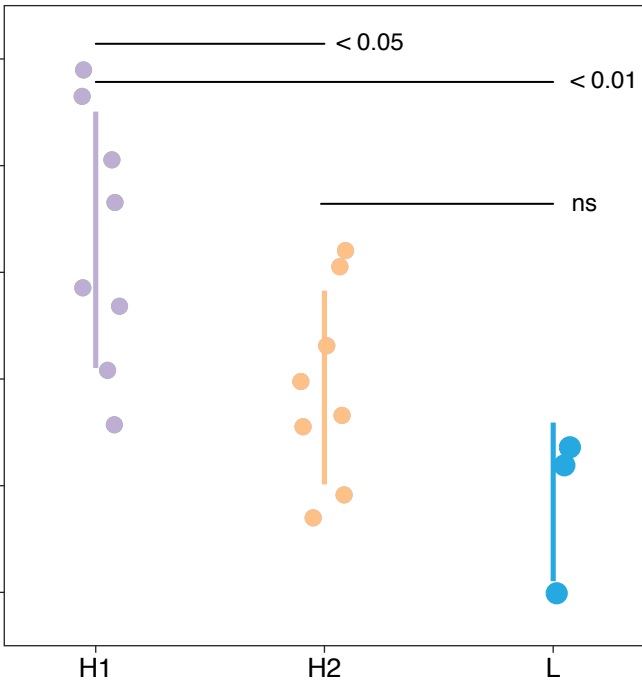

Supplement: supp [file elife-30916-supp-v1.zip › elife_poa_e30916_Figure_4_figure_supplement_2.pdf]

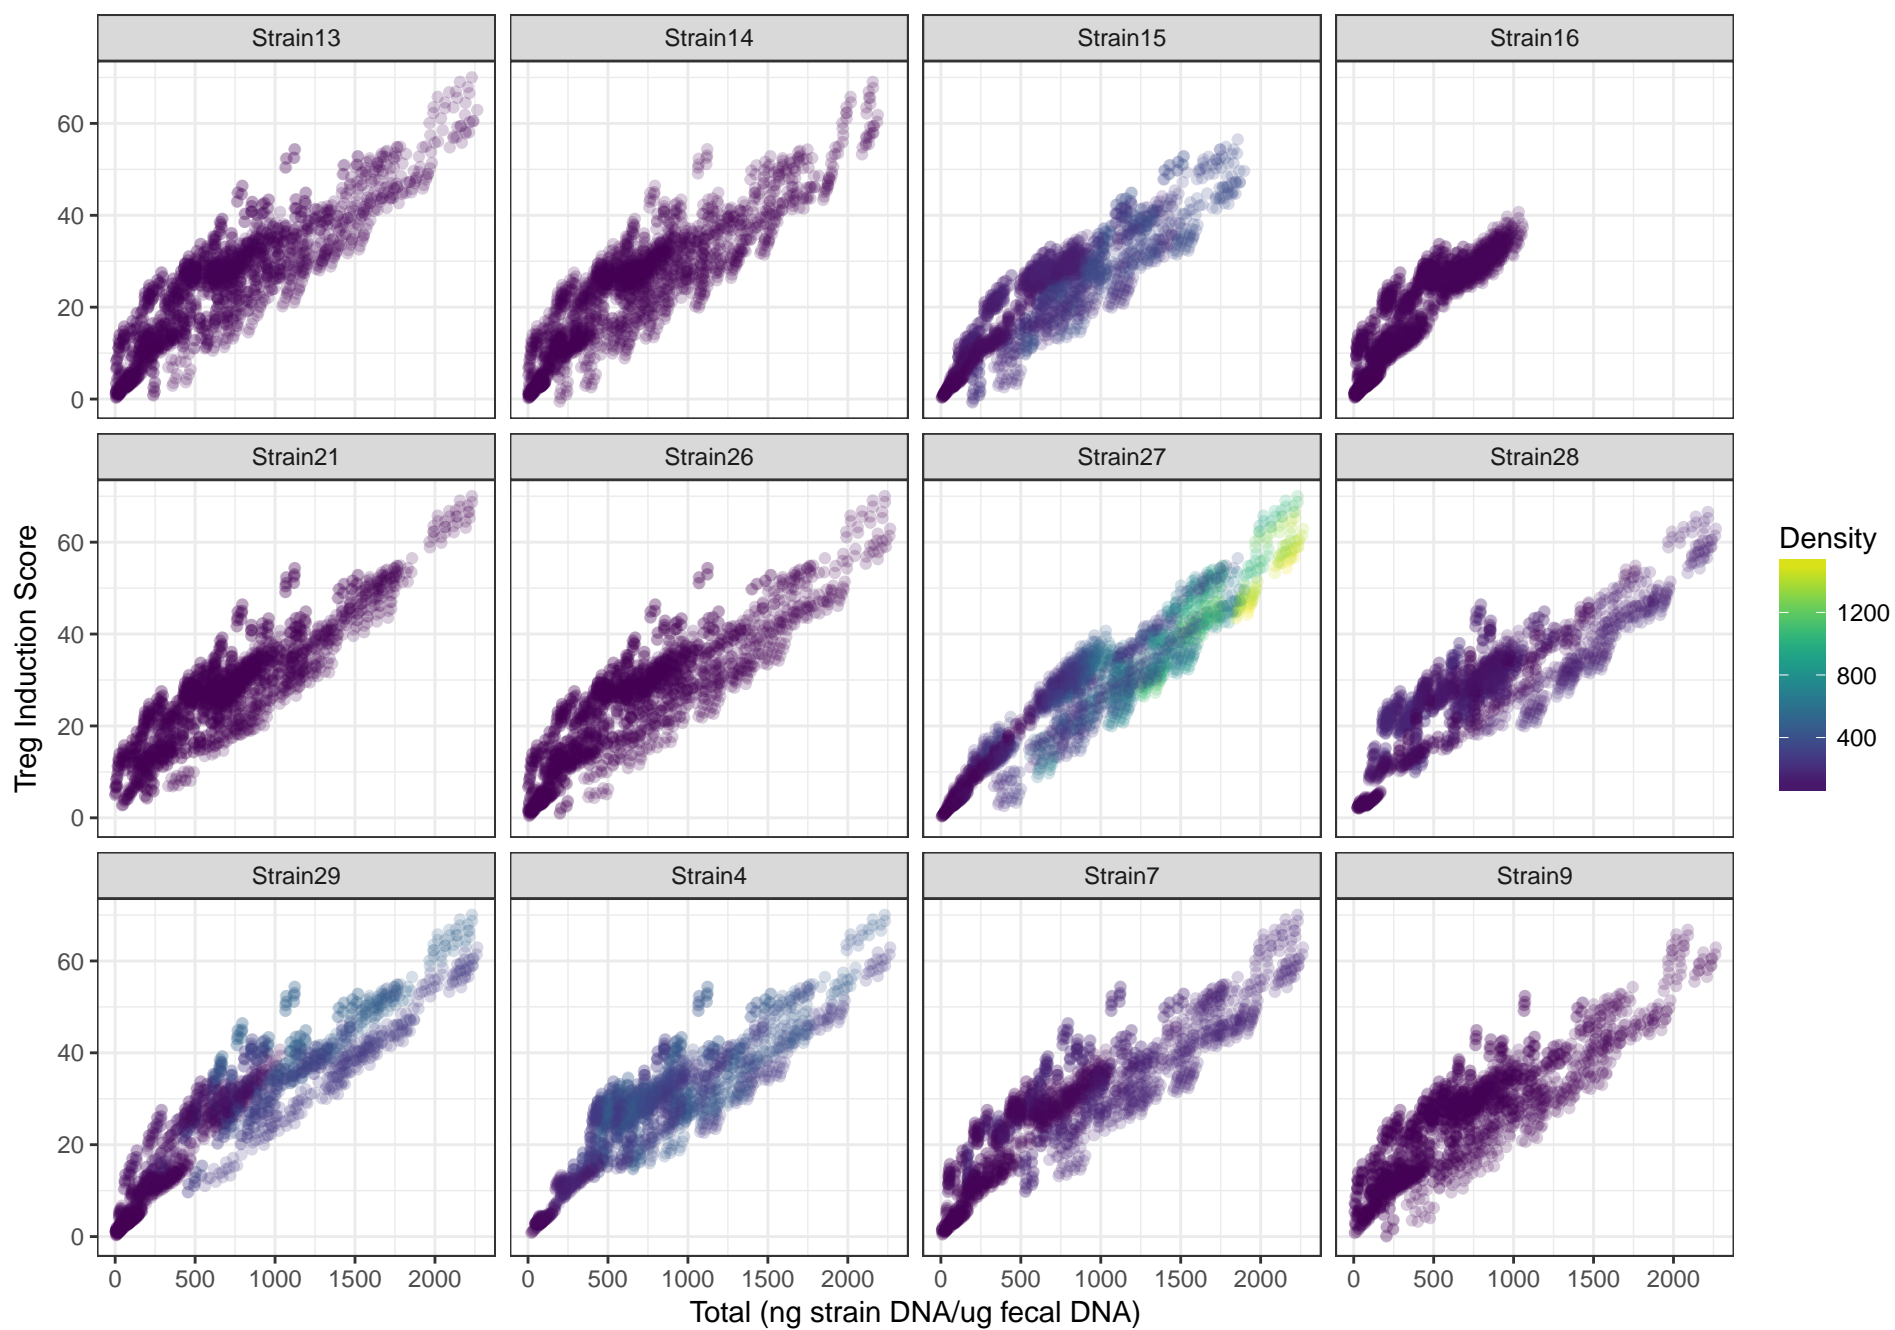

Supplement: supp [file elife-30916-supp-v1.zip › elife_poa_e30916_Figure_4_figure_supplement_1.pdf]
